# Supplementary material
Source: publisher figshare collection journal article supplement (https://gsapubs.figshare.com/articles/dataset/_/20436093)
Supplement: Supplementary file 1 [file 1]

## Sheet: Table S1
Sample ID	U1340 MCD (m)	Mean Grain Size (um)	% Clay Size (<4um)	% Silt (4-63um)	% very fine sand (63-125um)	% fine sand (125-250um)	% medium sand (250-500um)	% Total Diatoms (pennate + centric)	% Pennate	% Total Centric Diatom	% Centric Diatom Fragment	% Whole Centric	Normalized % Whole Centric	% Sponge Spicules	% Radiolarian	% Silicoflagellates	% Forams	% Coccoliths	% Volcanic Material	% Clay Minerals	% Opaque Material	% Siliciclastic Material
U1340A-1H-1, 0.0 cm	-0.06	34.9312	7.24041	54.3674	14.0453	23.4312	0.9157	55.8955	17.3688	38.5267	34.7729	3.75378	9.74332	2.78312	0	0	15.8905	0	0.645161	14.6601	0.322581	9.80308
U1340A-1H-1, 5.0 cm	-0.0105	34.7039	5.86907	59.3752	15.0483	19.6982	0.0092	60.9705	17.5555	43.415	40.0007	3.41435	7.86445	2.71157	0	0	0.740741	0	4.899	14.3862	1.65826	14.6338
U1340A-1H-1, 85.0 cm	0.7895	26.6018	11.3793	52.8181	22.271	13.5316	0	41.3008	13.1172	28.1836	28.1836	0	0	0.47619	0	0	4.63812	9.00177	4.16486	20.9822	3.96375	15.4723
U1340A-1H-1, 89.0 cm	0.8295	NA	NA	NA	NA	NA	NA	33.439	7.9933	25.4457	18.4219	7.02381	27.6032	0.833333	0	1.42857	10.7331	3.53089	8.02739	17.4516	0	24.5562
U1340A-1H-1, 106.0 cm	0.9995	26.1463	9.89821	61.3753	14.1627	14.5352	0.0286	48.0334	13.813	34.2203	32.1763	2.04408	5.97328	0	0	0	0.996318	11.6647	5.5235	20.8802	4.01955	8.88239
U1340A-1H-1, 114.0 cm	1.0795	41.7337	6.06452	50.5059	18.1247	23.7002	1.6047	66.4949	37.0415	29.4534	25.9773	3.47619	11.8023	0	0	0	0.952381	11.5127	0	13.3433	1.92157	5.7751
U1340A-1H-1, 119.0 cm	1.1295	28.1516	8.36985	62.825	17.9228	10.8802	0.0022	37.74	7.14274	30.5973	30.1427	0.454545	1.48557	0.833333	0	0	3.2742	4.6545	2.74051	24.8279	7.74749	18.182
U1340A-1H-1, 124.0 cm	1.1795	18.8798	11.3709	72.8714	10.277	5.4807	0	42.0887	12.9684	29.1203	26.3222	2.79805	9.60861	1.05263	0	0	4.70238	8.46377	1.36364	28.7318	3.88369	9.71342
U1340A-1H-1, 131.0 cm	1.2495	31.1342	7.71734	58.9049	14.3007	19.0771	0	52.6342	16.9403	35.6938	31.4418	4.25197	11.9123	0.8	0	0	7.14992	11.1829	0.689655	19.3443	2.13645	6.06267
U1340A-1H-1, 143.0 cm	1.3695	NA	NA	NA	NA	NA	NA	57.7658	18.5311	39.2347	25.3517	13.883	35.3846	0.666667	0.666667	0	0.666667	8.26304	6.42971	16.314	2.89577	6.33167
U1340A-1H-1, 146.0 cm	1.3995	NA	NA	NA	NA	NA	NA	68.7572	18.7819	49.9753	37.2286	12.7467	25.5061	0	0	1.14907	0.97619	8.2712	0.833333	8.27606	1.0049	10.732
U1340A-1H-2, 0.0 cm	1.45	28.3528	7.79557	65.424	12.1194	12.7021	1.9505	56.369	19.4753	36.8938	21.3114	15.5824	42.2359	0	0	0	2.1978	4.14057	12.884	14.0328	3.84096	6.5348
U1340A-1H-2, 1.0 cm	1.4595	28.9668	6.37079	69.6075	12.4488	11.5729	0	70.8169	22.8381	47.9788	39.7357	8.24314	17.1808	0	0	0	2.52406	4.92	2.08333	9.56471	3.60176	6.48926
U1340A-1H-2, 23.0 cm	1.6795	30.9986	6.49962	65.8644	16.9027	10.56	0.1733	66.3128	28.8702	37.4426	29.1548	8.28778	22.1346	0.526316	0	0	5.27365	4.24911	0.740741	14.8712	1.25418	6.77199
U1340A-1H-2, 40.0 cm	1.8495	48.1025	5.58477	45.0998	18.5421	27.866	2.9073	49.9583	12.1369	37.8214	34.9603	2.86111	7.56479	0	0	0	2.55556	7.22817	3.54167	14.004	8.68651	14.0258
U1340A-1H-2, 45.0 cm	1.8995	23.2748	10.5011	65.9102	15.1238	8.4639	0.001	29.6131	5.94356	23.6696	22.1723	1.49733	6.32595	0	0	0	1.39715	4.24257	1.75965	38.2964	5.51092	19.1802
U1340A-1H-2, 105.0 cm	2.4995	9.00474	25.5144	69.6439	4.8417	0	0	38.6032	11.4076	27.1956	25.1853	2.01028	7.39194	0.37037	0	0	3.08034	7.63071	3.40417	20.6033	8.71476	17.5931
U1340A-1H-3, 35.0 cm	3.2995	7.87649	27.7129	70.3639	1.9232	0	0	31.8719	3.62277	28.2491	28.2491	0	0	0	0	0	0	0	10.5014	31.0559	2.39261	24.1782
U1340D-1H-3, 16.0 cm	3.42224	9.1293	26.6791	68.3946	4.9263	0	0	43.5269	6.18539	37.3415	33.615	3.72643	9.97933	0	0	0	0	2.5049	3.17933	29.6522	4.77534	12.6349
U1340D-1H-3, 28.0 cm	3.54224	8.38385	27.634	68.6666	3.6994	0	0	34.9601	7.88408	27.076	27.076	0	0	1.53846	0	0	0	0.714286	7.14058	25.8807	2.77903	26.9869
U1340D-1H-3, 52.0 cm	3.78224	14.2152	15.4828	73.9443	9.0799	1.493	0	23.3197	2.67157	20.6481	20.6481	0	0	1.17647	0	0	1.17647	0	12.1764	21.3237	4.77752	36.0497
U1340D-1H-3, 76.0 cm	4.02224	9.06615	27.1719	68.2325	4.5956	0	0	38.4959	10.5421	27.9538	27.9538	0	0	0.909091	0	0	0	0.47619	6.47637	36.1363	2.8211	14.6851
U1340D-1H-3, 94.0 cm	4.20224	9.51898	23.8145	71.7396	4.4459	0	0	35.4261	6.0851	29.341	29.341	0	0	4.4787	0	0	0	0.769231	11.5446	24.1146	4.03822	19.6286
U1340D-1H-3, 112.0 cm	4.38224	10.6763	21.652	72.0423	6.3057	0	0	44.6539	11.4681	33.1858	26.3964	6.78943	20.4588	0	0	0	1.42857	8.20306	3.00187	20.5789	4.43383	10.9104
U1340D-1H-3, 124.0 cm	4.50224	10.5858	22.7948	71.4003	5.8049	0	0	39.9122	10.0958	29.8164	24.8795	4.93693	16.5578	0	0	0.606061	2.30541	6.18895	5.33934	20.4002	5.09657	15.2143
U1340D-1H-3, 142.0 cm	4.68224	9.974	22.2176	73.449	4.3334	0	0	46.7266	12.0536	34.673	31.3094	3.36364	9.70102	0.869565	0.588235	0	1.30435	3.72222	3.87344	23.031	3.95469	12.5662
U1340D-1H-4, 16.0 cm	4.92224	14.2921	17.8887	67.831	13.2649	1.0154	0	45.0855	12.4247	32.6607	29.5818	3.07895	9.42706	0	0	0	0.666667	2.73033	11.2331	18.3961	3.00886	15.8005
U1340D-1H-4, 28.0 cm	5.04224	11.658	19.8092	74.3302	5.8606	0	0	59.4671	18.0932	41.3739	39.5521	1.82186	4.40341	0	0	0	0	4.39969	2.5	20.2725	1.875	9.6638
U1340D-1H-4, 52.0 cm	5.28224	10.7244	21.7787	72.9525	5.2688	0	0	49.5	15.4343	34.0657	34.0657	0	0	1.25	0	0	0	2.37374	8.23232	16.0631	4.19192	18.3889
U1340D-1H-4, 82.0 cm	5.58224	9.87643	26.5414	66.5905	6.8681	0	0	38.0495	11.6382	26.4113	25.4113	1	3.78626	1.53846	0	0	0	0	8.84449	24.1775	8.33651	18.0535
U1340A-2H-2, 4.0 cm	6.5718	20.2566	10.2573	72.0909	11.147	6.5048	0	66.8128	18.1653	48.6474	35.6083	13.0391	26.8033	0.666667	0	0	0	5.26879	6.55108	9.83313	3.6388	7.22877
U1340A-2H-2, 10.0 cm	6.6318	15.623	13.0825	77.6543	8.2142	1.049	0	66.8475	15.2675	51.5799	37.2619	14.318	27.7589	6.09987	0.967742	1.02273	1.6129	2.9299	4.09512	4.66403	5.88421	5.87603
U1340A-2H-2, 22.0 cm	6.7518	13.2901	15.0773	79.3284	5.5659	0.0284	0	68.5133	18.9429	49.5704	41.9628	7.6076	15.3471	1.88034	0	0	0.833333	1.56517	5.72619	5.95971	2.46795	13.054
U1340A-2H-2, 34.0 cm	6.8718	11.9662	19.585	72.991	7.4227	0.0013	0	51.3883	14.4888	36.8994	34.6511	2.24838	6.09326	2.30769	0.625	0.625	0	1.2549	9.92898	11.862	5.83261	16.1755
U1340A-2H-2, 46.0 cm	6.9918	19.8016	11.437	69.0303	15.2616	4.2711	0	34.5831	5.92967	28.6534	26.3617	2.29167	7.99788	0.625	0	0	0.833333	0	10.379	10.4851	10.1051	32.9895
U1340A-2H-2, 55.0 cm	7.0818	23.3927	12.9524	58.266	23.5281	5.2535	0	26.6809	2.5366	24.1443	21.4132	2.73109	11.3115	3.38294	0	0	0	0	16.9069	6.95424	8.32272	37.7523
U1340A-2H-2, 112.0 cm	7.6518	8.43744	28.6348	65.9656	5.3996	0	0	48.0912	10.7225	37.3687	35.2096	2.15909	5.77781	0	0	0	0	0	7.0902	22.9969	2.90217	18.9195
U1340A-2H-2, 124.0 cm	7.7718	30.6499	7.42946	60.3922	23.2285	8.8419	0.1079	49.6959	6.01496	43.6809	31.1233	12.5577	28.7487	0	0	0	0	1.57576	9.91453	16.0531	3.38996	19.3707
U1340A-2H-2, 126.0 cm	7.7918	32.5305	5.84414	59.7522	30.5203	3.8834	0	71.1396	7.74777	63.3918	34.7483	28.6435	45.1848	0	0	0	0	0	1.81818	9.53283	2.08965	15.4198
U1340A-2H-2, 127.0 cm	7.8018	32.9118	6.13755	60.159	27.7119	5.3945	0.597	61.5536	8.56887	52.9848	36.4398	16.5449	31.2258	0	0	1.42857	9.72259	4.38346	5.40293	5.69268	6.84824	4.96789
U1340A-2H-2, 128.0 cm	7.8118	32.565	5.0731	62.5699	32.2925	0.0645	0	68.3933	7.59342	60.7999	43.3679	17.432	28.6711	0	0	0	8.52259	4.48687	0.769231	8.1786	5.44751	4.20187
U1340A-2H-2, 129.0 cm	7.8218	26.6832	8.92669	62.2453	24.9842	3.8434	0.0004	74.5122	7.41713	67.095	38.9545	28.1406	41.9413	0	0	0	0	2.06041	0	6.55303	5.3243	11.5501
U1340A-2H-2, 130.0 cm	7.8318	29.062	7.41181	63.3695	24.1114	5.0576	0.0497	52.4948	7.84933	44.6455	38.4661	6.17939	13.841	1.23457	0	0	2.60536	3.90493	2.83001	16.0847	5.9197	14.9258
U1340A-2H-2, 131.0 cm	7.8418	39.2704	5.42977	56.0499	22.5628	13.1747	2.7828	62.2049	6.73234	55.4726	30.2889	25.1837	45.3985	1.51515	0	0	0	0.534759	1.74688	8.61154	10.9396	14.4472
U1340A-2H-2, 132.0 cm	7.8518	35.5052	5.09591	62.5823	21.5445	9.2757	1.5016	72.7413	15.1055	57.6358	31.4671	26.1687	45.4035	0	0	0	5.65107	2.66992	0.5	6.19343	4.77014	7.47415
U1340A-2H-2, 133.0 cm	7.8618	30.2684	6.03452	70.608	14.798	8.5595	0	81.5972	18.8255	62.7716	42.0393	20.7324	33.0282	0	0	0	0	3.95693	0	5.53864	4.40271	4.50455
U1340A-2H-2, 134.0 cm	7.8718	28.0267	6.59705	72.721	14.5504	6.1316	0	68.6123	17.6741	50.9382	22.7995	28.1387	55.2408	0	0	1.75	4.13234	5.0299	2.94012	6.58745	4.60482	6.34305
U1340A-2H-2, 135.0 cm	7.8818	25.5396	7.50545	75.5705	11.7553	5.1687	0	64.7203	14.3876	50.3327	34.9047	15.428	30.6519	0	0	0	0	1.52943	0.952381	7.41152	9.42308	15.9633
U1340A-2H-2, 136.0 cm	7.8918	27.0505	7.54443	70.6573	15.5849	6.2134	0	61.7096	15.8721	45.8376	38.0613	7.7763	16.9649	0	1.11111	0.526316	2.94118	2.87828	6.93838	12.7809	2.51044	8.60377
U1340A-2H-2, 137.0 cm	7.9018	24.0427	7.46271	76.922	9.4875	6.1278	0	68.0866	21.8171	46.2695	39.6397	6.62984	14.3287	0	0	0	0	1.23606	0	5.02699	6.47409	19.1762
U1340A-2H-2, 138.0 cm	7.9118	26.9617	7.16532	72.2687	12.6152	7.9508	0	72.3456	13.991	58.3547	45.7329	12.6218	21.6294	0	0	0	0	0	3.7598	4.34133	11.8313	7.72197
U1340A-2H-3, 4.0 cm	8.0718	7.03254	30.0762	69.0985	0.8253	0	0	41.0227	9.72652	31.2962	30.82	0.47619	1.52156	0	0	0	1.25	0	7.11255	32.8157	4.09318	13.7058
U1340A-2H-3, 40.0 cm	8.4318	6.41921	34.4555	65.3159	0.2286	0	0	39.7976	8.36368	31.4339	27.6732	3.76068	11.9638	0.8	0	0.4	0	0	7.27882	21.5419	2.49733	27.6843
U1340A-2H-3, 64.0 cm	8.6718	6.74916	32.5989	65.5622	1.8389	0	0	34.7314	5.94152	28.7899	28.7899	0	0	0.588235	0	0	0	0	13.0996	24.9861	5.32774	21.267
U1340A-2H-3, 82.0 cm	8.8518	6.55789	34.4701	64.5923	0.9376	0	0	23.7997	3.27632	20.5234	20.5234	0	0	0	0	0	0	0	11.3012	28.4927	9.91667	26.4898
U1340A-2H-3, 94.0 cm	8.9718	14.0224	15.8143	73.8213	9.9664	0.398	0	47.6975	7.77857	39.9189	37.1704	2.74854	6.8853	0	0	0	0	0	9.18098	20.3756	4.47979	18.2661
U1340A-2H-3, 100.0 cm	9.0318	12.9015	17.1491	74.2866	8.5606	0.0037	0	41.771	10.9808	30.7902	29.0759	1.71429	5.56764	4.0724	0	0	0	0	15.1464	13.4271	4.10584	21.4773
U1340A-2H-3, 106.0 cm	9.0918	15.6982	13.3695	75.9952	10.2424	0.3929	0	51.4993	7.43612	44.0632	40.3458	3.71734	8.43638	1.92857	0	0	0	0	14.8792	5.60305	6.94591	19.1439
U1340A-2H-3, 112.0 cm	9.1518	18.6873	10.8709	74.9164	11.2687	2.944	0	48.8063	10.5088	38.2975	31.0962	7.20132	18.8036	0.666667	0	0	0	0	13.4758	10.1979	5.30622	21.5471
U1340A-2H-3, 118.0 cm	9.2118	14.6907	14.4979	75.133	10.1681	0.201	0	50.4221	6.89029	43.5318	32.6517	10.8801	24.9934	0.588235	0	0	0	0	11.4387	14.7295	3.84751	18.9739
U1340A-2H-3, 124.0 cm	9.2718	12.5133	17.8304	74.1506	8.0141	0.0049	0	44.4538	11.9833	32.4706	32.4706	0	0	0	0	0	0	0.666667	14.9818	20.8975	4.73768	14.2625
U1340A-2H-3, 130.0 cm	9.3318	11.7961	21.8301	67.5255	10.5827	0.0617	0	40.3011	10.7654	29.5357	26.0516	3.48416	11.7964	0	0	0	0	0	10.376	18.822	5.31078	25.1902
U1340A-2H-4, 4.0cm	9.57	8.60607	30.0236	60.5742	7.4236	1.9786	0	43.4443	9.78914	33.6551	28.2309	5.42424	16.1171	0	0	0	0	0	7.961	32.1409	1.81201	14.6418
U1340A-2H-4, 10.0 cm	9.6318	8.02385	29.2291	67.9975	2.7734	0	0	36.2898	8.97941	27.3104	26.1993	1.11111	4.06845	0	0	0	0	1	16.1461	23.8916	4.23388	18.4386
U1340A-2H-4, 16.0 cm	9.6918	34.3464	8.8953	51.5064	19.2087	18.6967	1.6929	37.0896	11.2442	25.8454	24.5121	1.33333	5.15887	1.45238	0	0.588235	0	0.833333	8.26	25.8237	4.06787	21.8849
U1340A-2H-4, 18.0 cm	9.71	14.3951	17.0226	69.2935	11.672	2.0115	0.0004	44.9659	8.93429	36.0316	32.9504	3.0812	8.55139	0.8	0	0	0	0.27027	3.61635	27.0784	10.2061	13.063
U1340A-2H-4, 19.0 cm	9.7218	25.9289	9.52974	62.7498	21.4302	6.2901	0.0002	47.9172	12.0512	35.866	34.366	1.5	4.18223	0.625	0	0.416667	0	1.4	5.25317	25.3855	3.80675	15.1958
U1340A-2H-4, 21.0 cm	9.7418	23.3009	9.76169	67.222	20.9318	2.0845	0	54.583	10.4393	44.1437	38.2282	5.91546	13.4005	0	0	0	0.75	3.49589	2.84058	18.5364	3.83768	15.9564
U1340A-2H-4, 22.0 cm	9.7518	30.6273	7.09024	60.511	27.8942	4.3446	0.16	66.1551	9.97591	56.1792	41.0776	15.1015	26.881	0.5	0	0	0.916667	3.18729	5.43347	14.3504	2.38267	7.07445
U1340A-2H-4, 24.0 cm	9.7718	28.687	6.8602	65.762	24.7973	2.5801	0.0004	65.0535	12.2902	52.7633	40.4534	12.3099	23.3304	0	0	0	1.30435	7.57493	0.625	8.81328	4.09347	12.5355
U1340A-2H-4, 25.0 cm	9.7818	31.8928	5.2849	63.2101	28.6899	2.8066	0.0085	80.8082	17.3223	63.4858	27.6571	35.8288	56.4359	0	0	0	1.66667	3.79762	1.42857	5.92262	0.714286	5.66209
U1340A-2H-4, 26.0 cm	9.7918	34.699	4.67164	59.9328	32.5805	2.8105	0.0046	71.5682	11.4207	60.1476	38.6609	21.4866	35.7232	0	0	0	0	4.77826	2.36624	9.30296	5.04128	6.94301
U1340A-2H-4, 27.0 cm	9.8018	31.2169	5.6629	63.2214	30.8801	0.2356	0	71.6465	5.07989	66.5666	50.2189	16.3477	24.5585	0	0	0	0	5.84912	3.40278	6.3958	6.00303	6.70281
U1340A-2H-4, 28.0 cm	9.8118	36.1285	4.22301	61.2004	31.2244	3.2517	0.1005	73.663	16.3356	57.3275	32.7675	24.56	42.8416	0	0	0	2.79167	3.64261	1.54762	7.15156	2.40476	8.79874
U1340A-2H-4, 29.0 cm	9.82	29.7952	6.34699	64.7909	28.8331	0.029	0	67.6129	11.0377	56.5751	35.0772	21.4979	37.9988	0	0	0	1.60417	1.64598	2.03646	15.7019	4.69205	6.70659
U1340A-2H-4, 30.0 cm	9.8318	32.8371	4.55268	67.6788	24.57	3.1905	0.008	84.4343	15.9293	68.5051	34.3535	34.1515	49.8526	0	0	0	0	1.81818	0	1.81818	9.70707	2.22222
U1340A-2H-4, 35.0 cm	9.8818	9.30505	26.4255	68.071	5.5035	0	0	33.2647	7.25542	26.0092	24.3426	1.66667	6.40798	0	0	0	0	0	10.8021	32.428	2.45833	21.0468
U1340A-2H-4, 47.0 cm	10	8.27718	30.882	60.748	7.99	0.38	0	40.8042	5.8158	34.9884	34.9884	0	0	0	0	0.833333	0	0	12.8228	29.1645	6.24315	10.132
U1340A-2H-4, 71.0 cm	10.2418	8.79931	28.1627	67.1012	4.7361	0	0	47.8959	9.97571	37.9202	36.332	1.58824	4.18836	0	0	0	0	0	13.9362	16.7271	1.83333	19.6075
U1340A-2H-4, 107.0 cm	10.6018	9.89145	24.5458	69.2425	6.2117	0	0	35.3977	4.6552	30.7425	29.8334	0.909091	2.95712	0	0	0	0	0	15.2143	23.7737	7.50043	18.1139
U1340A-2H-4, 119.0 cm	10.7218	9.96315	25.7262	68.042	6.2318	0	0	41.4503	5.79762	35.6527	35.6527	0	0	1.17647	0.416667	1.66667	0	0	7.70518	16.6905	7.60994	23.2843
U1340A-2H-5, 4.0 cm	11.0818	9.9059	24.7394	70.4425	4.8181	0	0	31.4379	5.10256	26.3353	26.3353	0	0	0	0	0	0	0	9.80808	19.2585	7.20346	32.292
U1340A-2H-5, 10.0 cm	11.1418	10.5803	24.1233	69.6354	6.2413	0	0	54.3081	12.6654	41.6427	41.6427	0	0	1.11111	0	0.666667	0	0	5.08333	13.0682	3.03409	22.7285
U1340A-2H-5, 16.0 cm	11.2018	12.0424	18.4801	76.9077	4.6121	0.0001	0	52.6374	11.958	40.6793	38.9016	1.77778	4.37022	3.4188	0	0	0	0	3.57753	14.698	4.04762	21.6207
U1340A-2H-5, 34.0 cm	11.3818	12.9467	18.3596	73.1197	8.3169	0.2038	0	65.9782	18.1197	47.8585	46.1621	1.69643	3.54468	0	0	0	0	0	2.85714	15.0074	3.68361	12.4736
U1340A-2H-5, 40.0 cm	11.4418	14.3796	15.9596	75.7421	6.1078	2.1905	0	58.2876	19.2746	39.013	28.8392	10.1738	26.078	0	0	1.42857	0	0	8.08838	14.3942	7.03712	10.7641
U1340A-2H-5, 52.0 cm	11.5618	12.2725	20.2506	71.2671	6.56	1.9223	0	34.5075	8.73699	25.7705	25.7705	0	0	2.625	0	0	0	0	19.0418	10.6122	4.96999	28.2435
U1340A-2H-5, 70.0 cm	11.7418	15.4021	16.2273	70.6498	10.1334	2.9895	0	40.9822	6.59834	34.3839	30.0662	4.31771	12.5574	1.89516	0	0	0	0	10.5308	14.6315	4.51775	27.4425
U1340A-2H-5, 94.0 cm	11.9818	18.8944	14.2341	66.0999	14.8446	4.8214	0	29.7915	2.4824	27.3091	24.3091	3	10.9854	1.85965	0	0	0	0	11.2218	11.0005	24.4955	21.6311
U1340A-2H-5, 100.0 cm	12.0418	24.1521	9.14708	70.0065	10.7363	10.1101	0	69.5124	20.6674	48.845	37.2023	11.6427	23.836	0	0	0	0	10.6189	0.666667	11.4622	2.17196	5.56782
U1340A-2H-5, 130.0 cm	12.3418	8.73647	26.7625	70.1597	3.0778	0	0	27.5	5.83333	21.6667	21.6667	0	0	0	0	0	0	0	33.3333	12.0833	2.08333	25
U1340A-2H-6, 10.0 cm	12.6518	18.6796	16.8112	71.9604	9.0303	2.1981	0	57.0437	11.1481	45.8956	41.4643	4.43135	9.65528	1.25	0	0.4	0	0	6.06314	12.8546	5.59646	16.7921
U1340A-2H-6, 22.0 cm	12.7718	14.445	12.926	77.0656	8.5572	1.4512	0	53.6536	14.5261	39.1275	39.1275	0	0	1.33333	0	0	0.588235	0	5.30719	17.0817	4.24183	17.7941
U1340A-2H-6, 52.0 cm	13.0718	13.3681	17.9653	75.8949	6.1388	0.001	0	48.6488	14.0779	34.5709	30.9952	3.57576	10.3432	0	0	0	0	0	10.7643	20.0722	4.52834	15.9863
U1340A-2H-6, 76.0 cm	13.3118	18.7921	14.5181	74.5649	8.5155	2.4015	0	60.5338	18.7551	41.7787	28.6935	13.0852	31.3203	0.625	0	0.769231	0	0	0.625	23.0453	3.72202	10.6797
U1340A-2H-6, 94.0 cm	13.4918	17.7958	10.2395	79.6392	7.3889	2.7324	0	64.2176	15.1747	49.0429	44.5429	4.5	9.17564	0	0	0	0	0	3.70671	17.2752	2.71645	12.0841
U1340A-2H-6, 112.0 cm	13.6718	15.9245	10.9485	77.9836	8.4461	2.6218	0	56.1533	16.1132	40.0401	36.5077	3.53247	8.82232	2.11455	0	0.588235	0	0	5.47619	13.9505	6.64415	15.0731
U1340A-2H-6, 130.0 cm	13.8518	20.734	8.2981	71.6599	11.7793	8.2624	0.0003	40.6935	11.8638	28.8297	26.3297	2.5	8.67162	0	0	0	0	0	14.336	10.2325	8.55696	26.1811
U1340D-2H-3, 126.0 cm	14.2992	15.441	13.0141	77.838	6.5855	2.5624	0	37.3434	10.9264	26.417	26.417	0	0	1.19048	0	1.19048	0	0	5.88972	29.9258	1.28205	23.1781
U1340D-2H-4, 4.0 cm	14.5792	7.20183	31.7636	65.2307	3.0057	0	0	24.0467	4.43854	19.6082	19.6082	0	0	0.357143	0	0	0	0	6.62857	41.7147	6.27438	20.9784
U1340D-2H-4, 32.0 cm	14.8592	19.7359	13.1476	66.6948	10.4773	9.6793	0.001	54.4467	18.6063	35.8404	33.8202	2.0202	5.63666	1.05263	0	0	0	0	4.6738	20.1485	6.48829	11.1699
U1340D-2H-4, 62.0 cm	15.1592	21.3046	10.0616	71.7174	10.91	7.311	0	55.7482	19.727	36.0212	33.5948	2.42647	6.73622	0.666667	0	0.833333	0	1.81818	4.79798	17.1588	2.24242	14.3079
U1340D-2H-4, 79.0 cm	15.3292	24.9954	12.8259	53.4233	19.8576	13.8932	0	49.4696	14.4156	35.0541	31.3861	3.66798	10.4638	0	0	0	0	1.33478	7.77104	22.2419	2.44196	13.0727
U1340A-3H-1, 36.0 cm	15.4234	17.9798	15.0888	62.1046	20.0015	2.8051	0	24.1906	5.59441	18.5962	18.5962	0	0	0	0	0	0	14.8925	26.9619	18.5962	6.06061	9.29811
U1340A-3H-1, 54.0 cm	15.6034	13.4306	18.7991	67.8083	12.5465	0.8461	0	35.2913	9.96638	25.325	24.7	0.625	2.46792	1.90909	0	0	0.909091	3.85354	16.0114	23.074	4.61111	14.3404
U1340A-3H-1, 78.0 cm	15.8434	16.7092	14.9184	67.7541	14.167	3.1605	0	49.0234	22.569	26.4544	21.4302	5.02417	18.9918	0	0	0	5.05049	6.30461	2.07221	27.7687	5.61769	4.16295
U1340A-3H-1, 104.0 cm	16.1034	18.0677	13.4063	68.6235	16.1873	1.7829	0	40.9988	12.1488	28.85	28.3738	0.47619	1.65057	0	0	0	1.42857	4.3516	7.03243	23.9329	5.09106	17.1646
U1340A-3H-1, 112.0 cm	16.1834	19.6481	11.1929	73.2701	13.5779	1.9591	0	60.9576	26.9334	34.0242	29.3498	4.67443	13.7385	0	0	0	0.416667	6.13813	4.75251	16.1798	5.01728	6.53797
U1340A-3H-1, 118.0 cm	16.2434	6.86303	34.0867	64.8569	1.0564	0	0	37.5972	12.9362	24.661	23.3567	1.30435	5.28911	0	0	0	1.85965	0.934783	10.018	28.5017	3.73793	17.3507
U1340A-3H-1, 130.0 cm	16.3634	7.91515	30.5857	64.5206	4.8937	0	0	35.2048	8.48257	26.7223	26.7223	0	0	0	0	0	0	5.77528	4.12518	37.9054	4.75067	12.2386
U1340A-3H-2, 10.0 cm	16.6634	7.56194	29.9252	67.5545	2.5203	0	0	31.787	8.15317	23.6338	23.6338	0	0	0	0	0	0.714286	2.61204	9.5098	31.4044	4.7549	19.2176
U1340A-3H-2, 40.0 cm	16.9634	10.6144	24.8756	67.3717	7.7527	0	0	24.7635	5.33993	19.4235	19.4235	0	0	0	0	0	0	0	26.5907	18.0293	5.9711	24.6455
U1340A-3H-2, 70.0 cm	17.2634	8.0468	31.5424	63.6607	4.7969	0	0	33.4286	5.16667	28.2619	28.2619	0	0	0	0	0	0.833333	0	10.5952	27.6944	7.93651	19.5119
U1340A-3H-2, 100.0 cm	17.5634	8.80024	29.1953	64.8857	5.919	0	0	39.9963	10.3341	29.6622	29.6622	0	0	0.555556	0	0	0	0	11.361	20.6264	5.59463	21.8661
U1340A-3H-2, 118.0 cm	17.7434	18.5131	12.358	72.4281	14.7667	0.4472	0	74.9785	23.9059	51.0726	43.2172	7.85539	15.3808	0	0	0.384615	0.357143	3.64853	0.882353	8.34744	3.77056	7.63087
U1340A-3H-2, 124.0 cm	17.8034	8.96589	27.2168	69.7479	3.0353	0	0	45.8273	13.4626	32.3646	32.3646	0	0	0	0	0	0	0	10.1218	18.6666	6.76371	18.6206
U1340A-3H-3, 10.0 cm	18.1634	28.564	7.69931	64.3975	19.0773	8.8243	0.0016	47.1197	12.9553	34.1644	31.0394	3.125	9.14695	0	0	0	2.30769	0	6.90365	17.0579	5.64297	20.9681
U1340A-3H-3, 34.0 cm	18.4034	10.8227	19.3057	75.7747	4.9196	0	0	31.9349	9.96008	21.9748	21.9748	0	0	1.86364	0	0	6.25028	0.5	10.3824	30.9323	3.24854	14.888
U1340A-3H-3, 52.0 cm	18.5834	12.9194	17.2782	75.1743	7.5458	0.0017	0	61.8479	23.7235	38.1245	23.7953	14.3291	37.5851	0	0	2.16346	0	0	0.625	24.2907	1.77632	9.29661
U1340A-3H-3, 58.0 cm	18.6434	19.5842	10.748	74.5852	10.7491	3.9177	0	58.3842	19.8566	38.5277	26.0973	12.4304	32.2634	0	2.96725	5.02541	0	0	3.14749	16.2866	2.27792	11.911
U1340A-3H-3, 64.0 cm	18.7034	18.6475	11.0656	75.8618	11.4511	1.6215	0	73.3691	20.9615	52.4077	35.6506	16.757	31.9744	0	0	2.39869	0	0	0.909091	10.0903	5.24858	7.98424
U1340A-3H-3, 70.0 cm	18.7634	19.9759	10.2968	76.6795	10.6829	2.3408	0	83.8889	25.5556	58.3333	42.2222	16.1111	27.619	0	0	0	0	0	0	9.44444	4.44444	2.22222
U1340A-3H-3, 76.0 cm	18.8234	29.0385	7.82431	64.3681	22.769	5.037	0.0016	67.2951	18.452	48.8431	20.0771	28.766	58.8946	0.833333	0	10.2285	1.76471	0.588235	1.62892	6.59492	4.54011	6.52615
U1340A-3H-3, 82.0 cm	18.8834	14.4215	16.2836	73.3578	8.3357	2.0229	0	51.7482	19.8245	31.9237	24.0156	7.90807	24.7718	1.17647	0	0	1.53846	5.468	6.23968	13.0228	7.07154	13.7349
U1340A-3H-3, 88.0 cm	18.9434	9.22948	24.5463	72.3086	3.1451	0	0	38.8735	7.54069	31.3328	31.3328	0	0	0	0	0	0	0	10.7104	23.5295	7.18687	19.6998
U1340A-3H-3, 124.0 cm	19.3034	18.4351	30.7672	67.9089	1.3239	0	0	68.1112	19.7848	48.3264	29.9827	18.3437	37.9579	0	0	0	0	2.08824	0	16.1708	4.45769	9.17208
U1340A-3H-3, 136.0 cm	19.4234	20.5397	29.0319	66.4947	4.4734	0	0	30.6209	5.29412	25.3268	25.3268	0	0	0	0	0	0	0	11.4379	45.9477	5.84967	6.14379
U1340A-10H-3, 25.0 cm	90.46	25.5141	12.9244	52.9716	22.2046	11.8994	0	54.9671	16.2833	38.6838	33.0533	5.63048	14.5551	1.50632	0	0	1.4189	0	3.02299	17.5463	5.45813	16.0803
U1340A-12H-3, 25.0 cm	109.46	28.3854	9.32999	57.8462	25.5589	7.2649	0	62.9076	16.4451	46.4625	45.5534	0.909091	1.95661	1.81707	0	0	0	0	3.35752	12.939	4.87865	14.1002
U1340A-13H-1, 25.0 cm	115.96	10.5052	26.5854	62.4762	10.7305	0.2079	0	54.5596	25.7022	28.8574	25.6525	3.20489	11.1059	0	0	0	3.51874	0	2.48804	19.3916	1.54933	18.4928
U1340A-15H-4, 25.0 cm	139.56	33.979	4.38245	59.9842	35.5821	0.0513	0	72.8918	17.5202	55.3716	50.5987	4.77294	8.61983	2.74848	0	1.39746	0.526316	0	1.72414	8.31867	1.58916	10.804
U1340A-16H-2, 25.0 cm	145.96	25.8198	8.59201	66.4329	20.1167	4.8584	0	76.8915	27.3484	49.5431	43.5777	5.96536	12.0408	0	0	1.04084	0.851449	0	0	9.4547	2.94501	8.81649
U1340A-17H-7, 25.0 cm	162.96	13.8348	15.7024	75.748	7.3408	1.2088	0	51.9672	10.8983	41.0689	36.6604	4.40848	10.7344	3.31166	0	0	0	0	5.96425	16.1723	5.13818	17.4464
U1340A-24H-7, 25.0 cm	212.76	38.0882	7.40701	46.4326	31.6677	14.4927	0	65.6308	14.7567	50.8742	49.5408	1.33333	2.62084	1.11111	0	0	0	0	4.05147	11.8906	4.26576	13.0502
U1340A-25-1, 25.0cm	213.26	13.2102	17.1293	75.6846	6.1997	0.9864	0	65.3747	20.7138	44.6608	44.6608	0	0	1.53846	0	0	0	0	0	13.9635	5.59269	13.5307
U1340A-25H-3, 25.0 cm	216.26	18.7923	11.3549	70.8124	16.6943	1.1384	0	65.0334	18.4743	46.5591	38.573	7.98611	17.1526	0	0	0	0	0	1.33333	20.2111	1.21693	12.2052
U1340A-25H-4, 96.0 cm	218.47	10.9726	21.599	71.7341	5.3066	1.3603	0	44.0049	19.3285	24.6764	22.7478	1.92857	7.81545	0.740741	0	0	0	0	6.64191	24.178	7.15197	17.2825
U1340A-27H-2, 25.0 cm	233.76	31.508	6.92497	60.0882	26.5546	6.4322	0	89.3911	16.2407	73.1504	59.7868	13.3636	18.2687	0	0	0	0	0	0	2.83066	0	7.77821

## Sheet: Info
Drake, M.K., Aiello, I.W., and Ravelo, A.C., 2022, Gamma-ray attenuation bulk density as
an indicator of diatom valve abundance and fragmentation in Pleistocene biosiliceous sediments
of the Bering Sea, in Aiello, I., Barron, J., and Ravelo, C., eds., Understanding the Monterey
Formation and Similar Biosiliceous Units across Space and Time: Geological Society of
America Special Paper 556, https://doi.org/10.1130/2022.2556(13).
